# Supplementary material
Source: PubMed Central journal article supplement (PMC3827621)
Supplement: DS_10.1177_0022034513504950.pdf [file DS_10.1177_0022034513504950.pdf]

## CLINICAL INVESTIGATIONS

# Patient-specific Analysis of Periodontal and Peri-implant Microbiomes

S.M. Dabdoub, A.A. Tsigarida, and P.S. Kumar\*

## APPENDIX

**Appendix Figure.**

Distribution of sequences by taxonomic level. The identified phyla were *Firmicutes* (54.2%), *Fusobacteria* (16.8%), *Proteobacteria* (14.8%), *Bacteroidetes* (7.59%), *Actinobacteria* (4.43%), *Synergistetes* (0.94%), *TM7* (0.74%), *Spirochaetes* (0.55%), *Tenericutes* (0.02%), *Chloroflexi* (0.01%), and *Cyanobacteria* (0.01%). At the genus level, the most highly abundant entries were *Streptococcus* (25.4%), *Fusobacterium* (15.2%), *Veillonella* (7.8%), and *Prevotella* (3.7%).

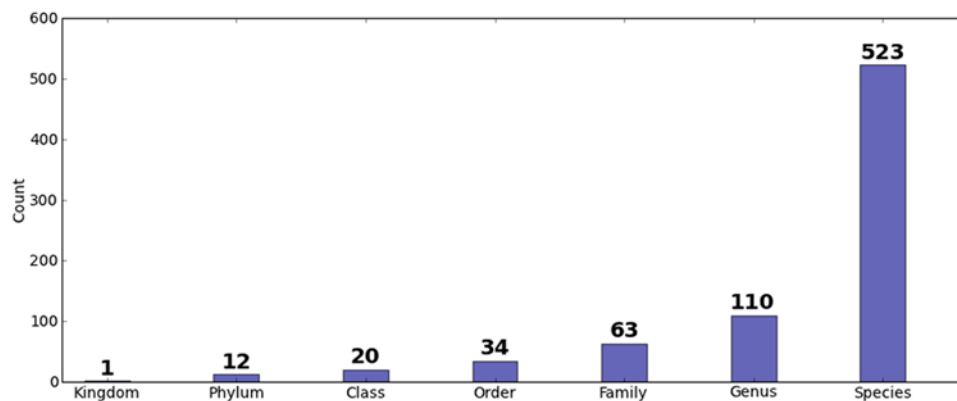

DOI: 10.1177/0022034513504950. Division of Periodontology, College of Dentistry, The Ohio State University, Columbus, OH, USA; \*corresponding author, kumar.83@osu.edu

© International & American Associations for Dental Research

**Appendix Table.**

Demographic Characteristics Analyzed Based on Health Status (mean percentages)

| Demographic Characteristics        | Healthy Tooth/<br>Healthy Implant<br>(n = 33) | Healthy Tooth/<br>Diseased Implant<br>(n = 23) | Diseased Tooth/<br>Healthy Implant<br>(n = 8) | Diseased Tooth/<br>Diseased Implant<br>(n = 17) |
|------------------------------------|-----------------------------------------------|------------------------------------------------|-----------------------------------------------|-------------------------------------------------|
| Age (yrs ± SD)                     | 56.3 ± 14.3                                   | 53.6 ± 12.8                                    | 64.3 ± 9.71                                   | 57.2 ± 16.9                                     |
| Sex (% males)                      | 63%                                           | 52.1%                                          | 25%                                           | 52.9%                                           |
| Ethnicity                          |                                               |                                                |                                               |                                                 |
| Caucasian                          | 75%                                           | 91.3%                                          | 75%                                           | 76.4%                                           |
| African American                   | 15%                                           | 4.3%                                           | 25%                                           | 11.7%                                           |
| Asian                              | 9%                                            | 4.3%                                           | —                                             | 11.7%                                           |
| Smokers %                          | 51.5%                                         | 52.1%                                          | 50%                                           | 41%                                             |
| Implant characteristics            |                                               |                                                |                                               |                                                 |
| Hx of implant loss %               | 3.1%                                          | 13%                                            | 12.5%                                         | 5.8%                                            |
| Hx of bruxism %                    | 6.4%                                          | 17.3%                                          | —                                             | 29.4%                                           |
| No. of implants (± SD)             | 2.6 ± 1.4                                     | 2.2 ± 1.9                                      | 2.3 ± 1.5                                     | 2.4 ± 1.7                                       |
| Implant type                       |                                               |                                                |                                               |                                                 |
| Astra (Osseospeed)                 | 24%                                           | 13%                                            | 25%                                           | 23.5%                                           |
| Zimmer (MTX)                       | 39.3%                                         | 47.8%                                          | 37.5%                                         | 47%                                             |
| Nobel                              | 12%                                           | 17.3%                                          | 12.5%                                         | 17.6%                                           |
| Straumann                          | 6%                                            | 4.3%                                           | 25%                                           | —                                               |
| 3i                                 | 9%                                            | 4.3%                                           | —                                             | 5.8%                                            |
| Calcitek                           | 6%                                            | 8.6%                                           | —                                             | 5.8%                                            |
| Paragon                            | 3%                                            | 4.3%                                           | —                                             | —                                               |
| Implant location                   |                                               |                                                |                                               |                                                 |
| Mandibular anterior                | 3%                                            | —                                              | —                                             | —                                               |
| Maxillary anterior                 | 24.2%                                         | 21.7%                                          | 12.7%                                         | 5.8%                                            |
| Mandibular posterior               | 27.2%                                         | 39.1%                                          | 62.5%                                         | 47%                                             |
| Maxillary posterior                | 45.5%                                         | 39.1%                                          | 25%                                           | 47%                                             |
| Yrs in function (± SD)             | 4.5 ± 3.0                                     | 5.9 ± 4.4                                      | 4.9 ± 4.0                                     | 5.5 ± 5.0                                       |
| Implant clinical characteristics   |                                               |                                                |                                               |                                                 |
| Modified Gingival Index            | 0.3 ± 0.3                                     | 2.0 ± 0.2                                      | 0.3 ± 0.3                                     | 2.0 ± 0.1                                       |
| Modified Plaque Index              | 0.55 ± 0.2                                    | 1.3 ± 0.1                                      | 0.45 ± 0.1                                    | 1.5 ± 0.1                                       |
| Bleeding on probing<br>(frequency) | 0%                                            | 100%                                           | 0%                                            | 100%                                            |
| PD (mm)                            | 2.94 ± 0.44                                   | 4.35 ± 0.56                                    | 2.76 ± 0.32                                   | 4.76 ± 0.54                                     |
| Tooth clinical characteristics     |                                               |                                                |                                               |                                                 |
| Modified Gingival Index            | 0.2 ± 0.1                                     | 2.2 ± 0.15                                     | 0.3 ± 0.12                                    | 2.4 ± 0.18                                      |
| Modified Plaque Index              | 0.43 ± 0.2                                    | 1.2 ± 0.1                                      | 0.42 ± 0.4                                    | 1.3 ± 0.2                                       |
| Bleeding on probing<br>(frequency) | 0%                                            | 100%                                           | 0%                                            | 100%                                            |
| PD (mm)                            | 2.34 ± 0.22                                   | 4.85 ± 0.56                                    | 2.6 ± 0.3                                     | 5.06 ± 0.41                                     |
| CAL (mm)                           | 1.65 ± 0.12                                   | 2.35 ± 0.16                                    | 1.16 ± 0.15                                   | 3.18 ± 0.13                                     |

No statistically significant differences were found among the 4 groups on any of the clinical descriptors.
